# Supplementary material for: In Vivo Gene Editing of Muscle Stem Cells with Adeno-Associated Viral Vectors in a Mouse Model of Duchenne Muscular Dystrophy
Source: PubMed Central journal article supplement (PMC7581966; doi:10.1016/j.omtm.2020.09.016), 2020-09-28
Supplement: mmc1.pdf [file mmc1.pdf]

OMTM, Volume 19

## **Supplemental Information**

### ***In Vivo* Gene Editing of Muscle Stem Cells with Adeno-Associated Viral Vectors in a Mouse Model of Duchenne Muscular Dystrophy**

**Jennifer B. Kwon, Adarsh R. ETTYREDDY, Ashish Vankara, Joel D. Bohning, Garth Devlin, Stephen D. Hauschka, Aravind Asokan, and Charles A. Gersbach**

**Table S1. Oligonucleotide sequences**

| Primer Name                       | Primer sequence (5'-3')                                                |
|-----------------------------------|------------------------------------------------------------------------|
| <b>Deletion PCR Primers</b>       |                                                                        |
| DMDin22 -F                        | TTTGTTGATTCTAAAAATCCCATGT                                              |
| DMDin23 -R                        | GGACTGAAGAACTTGGAGAAGGA                                                |
| NestDMDin22-F                     | GTTTCACTGTAGGTAAGTAAAATG                                               |
| NestDMDin23-R                     | GGAGCAACTTTGGAAAGTAAA                                                  |
| <b>Nextera Sequencing Primers</b> |                                                                        |
| DMDin22 Tn5-F                     | AAGCAGTGGTATCAACGCAGAGTAC ATTGCTTTATCAGATATTCTACT                      |
| DMDin23 Tn5-F                     | AAGCAGTGGTATCAACGCAGAGTAC TTCAAAAAGGAAGATGGTACAGTGTT                   |
| DMDEX22 Tn5-F                     | AAGCAGTGGTATCAACGCAGAGTAC GGATCCAGCAGTCAGAAAGC                         |
| DMDEX24 Tn5-F                     | AAGCAGTGGTATCAACGCAGAGTAC TCACCAACTAAAAGTCTGCATTG                      |
| Nextera-R                         | GTCTCGTGGGCTCGGAGATGTGTATAAGAGACAG                                     |
| i5+custom adapter forward primer  | AATGATACGGCGACCACCGAGATCTACACGCCTGTCCGCGGAAGCAGTGGTA<br>TCAACGCAGAGTAC |
| Barcoded reverse primer           | CAAGCAGAAGACGGCATAACGAGAT [Barcode] GTCTCGTGGGCTCGG                    |
| Custom sequencing primer          | CGGAAGCAGTGGTATCAACGCAGAGTAC                                           |

### A 5' gRNA Bulk muscle vs SC

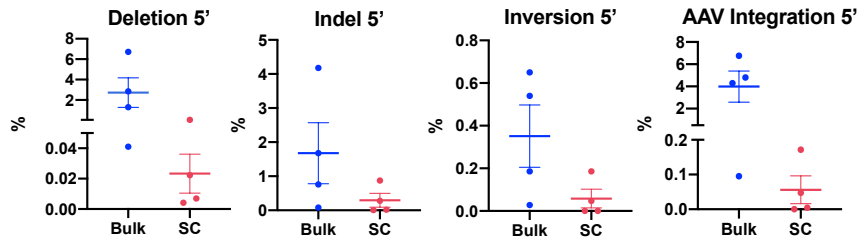

### 3' gRNA Bulk muscle vs SC

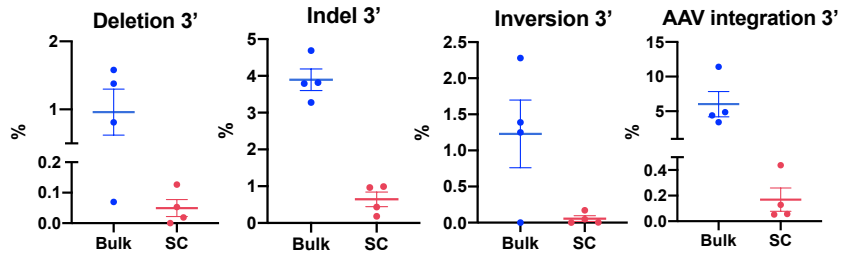

### B

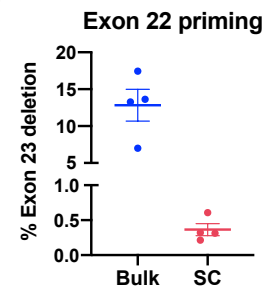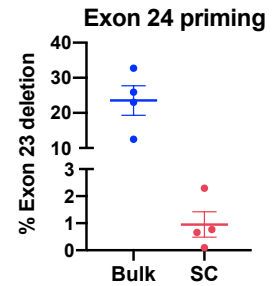

**Figure S1.** (A) Unbiased sequencing of satellite cell or bulk muscle genomic DNA after AAV9-CMV-CRISPR local administration quantifies the level of editing events for various gene-editing outcomes (B) Unbiased sequencing of satellite cell or bulk muscle mRNA after AAV9-CMV-CRISPR local administration quantifies the level of exon 23 deletion. (mean  $\pm$  SEM, n = 4 mice).
